# Supplementary material for: [(C 5 H 6 N 2 ) 2 H](Sb 4 F 13 ): a polyfluoroantimonite with a strong second harmonic generation effect
Source: Royal Society of Chemistry journal article supplement (doi:10.1039/d4sc01716a), 2024-01-01
Supplement: d4sc01716a1.pdf [file d4sc01716a1.pdf]

## Supporting Information

### **[(C<sub>5</sub>H<sub>6</sub>N<sub>2</sub>)<sub>2</sub>H](Sb<sub>4</sub>F<sub>13</sub>): A polyfluoroantimonite with strong second harmonic generation effect**

Jia-Hang Wu,<sup>a,b</sup> Chun-Li Hu,<sup>a,c</sup> Ya-Feng Li,<sup>b</sup> Jiang-Gao Mao<sup>a,c</sup> and Fang Kong<sup>a,c\*</sup>

<sup>a</sup> State Key Laboratory of Structural Chemistry, Fujian Institute of Research on the Structure of Matter, Chinese Academy of Sciences, Fuzhou 350002, P. R. China

<sup>b</sup> College of Chemistry, Fuzhou University, Fuzhou 350108, P. R. China

<sup>c</sup> University of Chinese Academy of Sciences, Beijing 100049, P. R. China

## Table of Contents

| Section           | Caption                                                                                                                                                                                                                                                         | Page       |
|-------------------|-----------------------------------------------------------------------------------------------------------------------------------------------------------------------------------------------------------------------------------------------------------------|------------|
| <b>Section S1</b> | Experimental Procedures.                                                                                                                                                                                                                                        | <b>S4</b>  |
| <b>Table S1</b>   | Summary of crystal data and structural refinements for (3PC) <sub>2</sub> (Sb <sub>4</sub> F <sub>14</sub> ) and (3AP) <sub>2</sub> (Sb <sub>4</sub> F <sub>13</sub> ).                                                                                         | <b>S10</b> |
| <b>Table S2</b>   | Atomic coordinates ( $\times 10^4$ ) and equivalent isotropic displacement parameters ( $\text{\AA}^2 \times 10^3$ ) for (3PC) <sub>2</sub> (Sb <sub>4</sub> F <sub>14</sub> ) and (3AP) <sub>2</sub> (Sb <sub>4</sub> F <sub>13</sub> ).                       | <b>S11</b> |
| <b>Table S3</b>   | The bond lengths ( $\text{\AA}$ ) and calculated bond valences for (3PC) <sub>2</sub> (Sb <sub>4</sub> F <sub>14</sub> ) and (3AP) <sub>2</sub> (Sb <sub>4</sub> F <sub>13</sub> ).                                                                             | <b>S13</b> |
| <b>Table S4</b>   | Selected Hydrogen bond lengths ( $\text{\AA}$ ) and angles ( $^\circ$ ) for (3PC) <sub>2</sub> (Sb <sub>4</sub> F <sub>14</sub> ) and (3AP) <sub>2</sub> (Sb <sub>4</sub> F <sub>13</sub> ).                                                                    | <b>S14</b> |
| <b>Table S5</b>   | Calculation of dipole moment for SbF <sub>4</sub> , SbF <sub>5</sub> , Sb <sub>4</sub> F <sub>13</sub> and net dipole moment for a unit cell in (3AP) <sub>2</sub> (Sb <sub>4</sub> F <sub>13</sub> ).                                                          | <b>S15</b> |
| <b>Table S6</b>   | The assignments of the IR absorption peaks for (3PC) <sub>2</sub> (Sb <sub>4</sub> F <sub>14</sub> ) and (3AP) <sub>2</sub> (Sb <sub>4</sub> F <sub>13</sub> ).                                                                                                 | <b>S16</b> |
| <b>Table S7</b>   | All the fluoroantimonite compounds with SHG effect and the coordination mode of Sb <sup>3+</sup> .                                                                                                                                                              | <b>S17</b> |
| <b>Table S8</b>   | SHG effect and energy bandgap of representative NLO organic-inorganic antimony halides.                                                                                                                                                                         | <b>S18</b> |
| <b>Figure S1</b>  | As-grown small crystals of (3PC) <sub>2</sub> (Sb <sub>4</sub> F <sub>14</sub> ) and (3AP) <sub>2</sub> (Sb <sub>4</sub> F <sub>13</sub> ).                                                                                                                     | <b>S19</b> |
| <b>Figure S2</b>  | Energy dispersive spectrum analysis and element distribution maps for (3PC) <sub>2</sub> (Sb <sub>4</sub> F <sub>14</sub> ) and (3AP) <sub>2</sub> (Sb <sub>4</sub> F <sub>13</sub> ).                                                                          | <b>S20</b> |
| <b>Figure S3</b>  | Simulated and measured powder X-ray diffraction patterns of (3PC) <sub>2</sub> (Sb <sub>4</sub> F <sub>14</sub> ) and (3AP) <sub>2</sub> (Sb <sub>4</sub> F <sub>13</sub> ).                                                                                    | <b>S21</b> |
| <b>Figure S4</b>  | The schematic diagram of the formation of the different of polyfluoroantimonite groups.                                                                                                                                                                         | <b>S22</b> |
| <b>Figure S5</b>  | Detailed structure views of (3PC) <sub>2</sub> (Sb <sub>4</sub> F <sub>14</sub> ) and (3AP) <sub>2</sub> (Sb <sub>4</sub> F <sub>13</sub> ): $\pi$ - $\pi$ stacking, the dihedral angles ( $\gamma$ ) and inter-ring distances between adjacent organic amines. | <b>S22</b> |
| <b>Figure S6</b>  | The TGA curves of (3PC) <sub>2</sub> (Sb <sub>4</sub> F <sub>14</sub> ) and (3AP) <sub>2</sub> (Sb <sub>4</sub> F <sub>13</sub> ).                                                                                                                              | <b>S23</b> |
| <b>Figure S7</b>  | Infrared spectra of (3PC) <sub>2</sub> (Sb <sub>4</sub> F <sub>14</sub> ) and (3AP) <sub>2</sub> (Sb <sub>4</sub> F <sub>13</sub> ).                                                                                                                            | <b>S24</b> |
| <b>Figure S8</b>  | UV-vis-NIR diffuse reflectance spectra of (3PC) <sub>2</sub> (Sb <sub>4</sub> F <sub>14</sub> ) and (3AP) <sub>2</sub> (Sb <sub>4</sub> F <sub>13</sub> ).                                                                                                      | <b>S25</b> |

|                   |                                                                                                                                                                                                         |            |
|-------------------|---------------------------------------------------------------------------------------------------------------------------------------------------------------------------------------------------------|------------|
| <b>Figure S9</b>  | Fluorescence spectra for $(3AP)_2(Sb_4F_{13})$ and 3AP under excitation at 330 nm.                                                                                                                      | <b>S26</b> |
| <b>Figure S10</b> | original crystal of $(3AP)_2(Sb_4F_{13})$ under the ortho-polarized light, crystal achieving complete extinction and the crystal thickness of $(3AP)_2(Sb_4F_{13})$ used for birefringence measurement. | <b>S27</b> |
| <b>Figure S11</b> | original crystal of $(3PC)_2(Sb_4F_{14})$ under the ortho-polarized light, crystal achieving complete extinction and the crystal thickness of $(3PC)_2(Sb_4F_{14})$ used for birefringence measurement. | <b>S28</b> |
| <b>Figure S12</b> | Calculated band structure, birefringence, total and partial density of states and electron density difference maps for $(3PC)_2(Sb_4F_{14})$ .                                                          | <b>S29</b> |
| <b>References</b> |                                                                                                                                                                                                         | <b>S30</b> |

## Experimental Procedures.

### Reagents.

The chemical reagents 3-pyridinecarboxamide (3PC, C<sub>6</sub>H<sub>6</sub>N<sub>2</sub>O) (98%, AR), 3-Aminopyridine (3AP, C<sub>5</sub>H<sub>6</sub>N<sub>2</sub>) (99.8%, AR), SbF<sub>3</sub> (98%, AR), Ethylene Glycol (99+%, AR) and HF (40+%, AR) were obtained from Aladdin Chemistry. *Caution: hydrofluoric acid is toxic and corrosive! It must be handled with extreme caution and with the appropriate protective equipment and training.*

### Syntheses.

Antimony trifluoride SbF<sub>3</sub> (1.780 g, 10 mmol) and 3-pyridinecarboxamide (0.476 g, 5 mmol) were dissolved in 10 mL ethylene glycol and 1 mL HF at room temperature. The mixture was allowed to evaporate slowly at room temperature and rod-shaped colorless crystals of (3PC)<sub>2</sub>(Sb<sub>4</sub>F<sub>14</sub>) were isolated in high yields of > 85% (based on C<sub>6</sub>H<sub>6</sub>N<sub>2</sub>O) after 2 weeks (Figure S1a). When using 3-aminopyridine to replace 3-pyridinecarboxamide, follow the same procedure, molar ratio, and solvent to obtain the light yellow crystals of (3AP)<sub>2</sub>(Sb<sub>4</sub>F<sub>13</sub>) after 2 months (Figure S1b), with a yield greater than 70% (based on C<sub>5</sub>H<sub>6</sub>N<sub>2</sub>). Powder XRD analyses confirmed the purity of the product (Figure S5). The presence of Sb, F, C and N elements were confirmed by energy-dispersive X-ray spectroscopy (EDS) analysis in the two compounds (Figure S4).

### Single-Crystal Structure Determination.

Single crystal X-ray diffraction data of (3PC)<sub>2</sub>(Sb<sub>4</sub>F<sub>14</sub>) and (3AP)<sub>2</sub>(Sb<sub>4</sub>F<sub>13</sub>) were obtained on a Agilent Technologies SuperNova dual-wavelength CCD diffractometer with a graphite-

monochromated Mo K $\alpha$  radiation ( $\lambda = 0.71073 \text{ \AA}$ ) at room temperature. Cell refinement and data reduction were performed using *CrysAlisPro*. The structures were determined by the direct method and refined by full-matrix least-squares fitting on  $F^2$  using *SHELXL17* crystallographic software package.<sup>[1, 2]</sup> The structural data were also checked by PLATON.<sup>[3]</sup>

**Powder X-ray Diffraction.** Powder X-ray Diffraction (PXRD) analysis was performed at room temperature. A Rigaku Miniflex600 diffractometer equipped with graphite monochromator Cu K $\alpha$  radiation ( $\lambda = 1.54186 \text{ \AA}$ ) was used to complete the measurement. The  $2\theta$  range is set to  $5\text{--}60^\circ$ , and the scan step size is  $0.02^\circ$ .

**Energy-Dispersive X-ray Spectroscopy.** Microprobe elemental analysis was carried out with the aid of a field-emission scanning electron microscope (JSM6700F) outfitted with an energy-dispersive X-ray spectroscope (Oxford INCA).

**Spectroscopic Measurements.** IR spectrum was measured by Magna 750 FT-IR spectrometer under the air background, and the selected range is  $4000\text{--}400 \text{ cm}^{-1}$ . UV-vis-NIR diffuse reflectance spectrum was recorded by a PerkinElmer Lambda 950 UV-vis-NIR spectrophotometer with BaSO<sub>4</sub> powder board as a reference for 100% reflectance, and the recording range was  $200\text{--}1600 \text{ nm}$ .<sup>[4]</sup> Absorption data was calculated from the diffuse reflection data by the Kubelka-Munk function:  $\alpha/S = (1-R)^2/2R$ , where  $\alpha$  and S represent the absorption coefficient and the scattering coefficient, respectively. The band gap value can be given by extrapolating the absorption edge to the baseline in the  $\alpha/S$  vs. energy graph. Photoluminescence (PL) excitation and emission spectra were measured on the FLS980 spectrometer (Edinburgh) equipped with both continuous (450 W) and pulsed xenon lamps. A

standard tungsten lamp was used to correct the optical response of the instrument.

**Thermal Analysis.** Thermogravimetric analyses (TGA) were performed in a nitrogen atmosphere using the NETZCH STA 449F3 thermal analyzer with an empty Al<sub>2</sub>O<sub>3</sub> crucible (the empty crucible was used as a reference) as a reference. The powder samples were heated in the crucible from 20°C to 800°C at a rate of 10°C min<sup>-1</sup>.

**Birefringence Test.** The birefringences of (3PC)<sub>2</sub>(Sb<sub>4</sub>F<sub>14</sub>) and (3AP)<sub>2</sub>(Sb<sub>4</sub>F<sub>13</sub>) were characterized by using the polarizing microscope equipped (ZEISS Axio Scope. A1) with Berek compensator. The wavelength of the light source was 546 nm. Owing to the clear boundary lines of the first-, second- and third-order interference color, the relative error was small enough. Before the scanning, the small and transparent (3PC)<sub>2</sub>(Sb<sub>4</sub>F<sub>14</sub>) and (3AP)<sub>2</sub>(Sb<sub>4</sub>F<sub>13</sub>) lamellar crystals were chosen to measure, in order to improve the accuracy of the birefringence.

The formula for calculating the birefringence is listed below,

$$R = |N_e - N_o| \times T = \Delta n \times T \quad \text{Eq. (1)}$$

Here, R represents the optical path difference,  $\Delta n$  means the birefringence, and T denotes the thickness of the crystal.<sup>[5]</sup>

**SHG Measurement.** Powder SHG measurements were conducted using a modified method of Kurtz and Perry. Irradiation laser ( $\lambda = 1.064 \mu\text{m}$ ) is generated by a Nd: YAG solid-state laser equipped with a Q switch. The (3AP)<sub>2</sub>(Sb<sub>4</sub>F<sub>13</sub>) pure crystal samples ground into powder were sieved according to six different particle size ranges (45–53, 53–75, 75–105, 105–150,

150–210 and 210–300  $\mu\text{m}$ ).  $\text{KH}_2\text{PO}_4$  (KDP) samples in the same size range were also prepared, which were used as reference. SHG signals oscilloscope traces of  $(3\text{AP})_2(\text{Sb}_4\text{F}_{13})$  and KDP samples in the particle size range (150–210  $\mu\text{m}$ ) were recorded.

**LIDT Measurement.** The laser-induced damage threshold (LIDT) measurements of  $(3\text{AP})_2(\text{Sb}_4\text{F}_{13})$  crystal samples were performed by a Q-switched pulsed laser. The particle size range of the tested sample is 150–210  $\mu\text{m}$ , the laser wavelength is 1064 nm; the pulse duration is 10 ns; the pulse frequency is 1 Hz and the laser spot area focused on the sample is 2.01  $\text{mm}^2$ . The energy of the laser emission was gradually increased during the measurement, and the LIDT of the sample was determined when it turned black in color under the laser.

**Computational Method.** Single-crystal structural data of compounds  $(3\text{PC})_2(\text{Sb}_4\text{F}_{14})$  and  $(3\text{AP})_2(\text{Sb}_4\text{F}_{13})$  were used for the theoretical calculations. The electronic structures were performed using a plane-wave basis set and pseudo-potentials within density functional theory (DFT) implemented in the total-energy code CASTEP.<sup>[6, 7]</sup> For the exchange and correlation functional, we chose Perdew–Burke–Ernzerhof (PBE) in the generalized gradient approximation (GGA).<sup>[8]</sup> The interactions between the ionic cores and the electrons were described by the ultrasoft pseudopotential.<sup>[9]</sup> The following valence-electron configurations were considered in the computation: Sb-5s<sup>2</sup>5p<sup>3</sup>, F-2s<sup>2</sup>2p<sup>5</sup>, C-2s<sup>2</sup>2p<sup>2</sup>, N-2s<sup>2</sup>2p<sup>3</sup>, O-2s<sup>2</sup>2p<sup>4</sup> and H-1s<sup>2</sup>. The numbers of plane waves included in the basis sets were determined by cutoff energy of 850 eV for  $(3\text{PC})_2(\text{Sb}_4\text{F}_{14})$  and  $(3\text{AP})_2(\text{Sb}_4\text{F}_{13})$ . The numerical integration of the Brillouin zone were performed using Monkhorst-Pack k-point sampling of  $2 \times 2 \times 1$  and  $3 \times 3 \times 2$ . The other parameters and convergent criteria were the default values of CASTEP code. To further

compare the optical properties of the conventional functional groups with the 3PC<sup>+</sup> and 3AP<sup>+</sup> cation, their electronic structures in molecular level were calculated through DFT method implemented by Gaussian09 package with the hybrid B3LYP functional at 6-31G(d,p) level.

The calculations of second-order NLO properties were based on length-gauge formalism within the independent particle approximation.<sup>[10]</sup> We adopted Chen's static formula, which was derived by Rashkeev et al.<sup>[11]</sup> and later improved by Chen's group. The second-order NLO susceptibility can be expressed as:

$$\chi^{\alpha\beta\gamma} = \chi^{\alpha\beta\gamma}(\text{VE}) + \chi^{\alpha\beta\gamma}(\text{VH}) + \chi^{\alpha\beta\gamma}(\text{two bands}) \quad \text{Eq. (2)}$$

where  $\chi^{\alpha\beta\gamma}(\text{VE})$  and  $\chi^{\alpha\beta\gamma}(\text{VH})$  contribute to  $\chi^{\alpha\beta\gamma}$  from virtual-electron processes and virtual-hole processes, respectively, and  $\chi^{\alpha\beta\gamma}(\text{two bands})$  contributes to  $\chi^{\alpha\beta\gamma}$  from the two-band processes. The formulae for calculating  $\chi^{\alpha\beta\gamma}(\text{VE})$ , and  $\chi^{\alpha\beta\gamma}(\text{VH})$ , are given in ref [12].

The calculations of linear optical properties in terms of the complex dielectric function  $\epsilon(\omega) = \epsilon_1(\omega) + i\epsilon_2(\omega)$  were made. The imaginary part of the dielectric function  $\epsilon_2$  was given in the following equation:

$$\epsilon_{ij}^2(\omega) = \frac{8\pi^2 h^2 e^2}{(m^2 V)} \sum_k \sum_{c,v} (f_c - f_v) \frac{p_{cv}^i(k) p_{cv}^j(k)}{E_{vc}^2} \delta [E_c(k) - E_v(k) - \hbar\omega] \quad \text{Eq. (3)}$$

The  $f_c$  and  $f_v$  represent the Fermi distribution functions of the conduction and valence band.

The term  $p_{cv}^i(k)$  denotes the momentum matrix element transition from the energy level  $c$  of the conduction band to the level  $v$  of the valence band at the  $k$ th point in the Brillouin zone (BZ), and  $V$  is the volume of the unit cell.

The real part  $\epsilon_1(\omega)$  of the dielectric function  $\epsilon(\omega)$  follows from the Kramer–Kronig relationship.

All the other optical constants may be derived from  $\epsilon_1(\omega)$  and  $\epsilon_2(\omega)$ . For example, the refractive



index  $n(\omega)$  can be calculated using the following expression:

$$n(\omega) = \left(\frac{1}{\sqrt{2}}\right) [\sqrt{\varepsilon_1^2(\omega) + \varepsilon_2^2(\omega) + \varepsilon_1(\omega)}]^{1/2} \quad \text{Eq. (4)}$$

**Table S1.** Summary of crystal data and structural refinements for (3PC)<sub>2</sub>(Sb<sub>4</sub>F<sub>14</sub>) and (3AP)<sub>2</sub>(Sb<sub>4</sub>F<sub>13</sub>).

| molecular formula                                        | (3PC) <sub>2</sub> (Sb <sub>4</sub> F <sub>14</sub> ) | (3AP) <sub>2</sub> (Sb <sub>4</sub> F <sub>13</sub> ) |
|----------------------------------------------------------|-------------------------------------------------------|-------------------------------------------------------|
| Formula Weight                                           | 499.64                                                | 923.24                                                |
| crystal system                                           | Triclinic                                             | Triclinic                                             |
| space group                                              | <i>P</i> -1                                           | <i>P</i> 1                                            |
| Temperature(K)                                           | 295.68(10)                                            | 250(10)                                               |
| F(000)                                                   | 460.0                                                 | 422.0                                                 |
| a/Å                                                      | 7.3227(10)                                            | 7.2222(3)                                             |
| b/Å                                                      | 7.4727(12)                                            | 8.1293(4)                                             |
| c/Å                                                      | 11.1037(16)                                           | 10.3779(4)                                            |
| α(deg)                                                   | 75.512(13)                                            | 101.002(4)                                            |
| β(deg)                                                   | 83.357(11)                                            | 105.247(4)                                            |
| γ(deg)                                                   | 85.846(13)                                            | 106.829(4)                                            |
| V/Å <sup>3</sup>                                         | 583.73(15)                                            | 538.65(4)                                             |
| Z                                                        | 2                                                     | 1                                                     |
| D <sub>c</sub> (g.cm <sup>-3</sup> )                     | 2.843                                                 | 2.846                                                 |
| GOF on F <sup>2</sup>                                    | 0.995                                                 | 1.045                                                 |
| R <sub>1</sub> ,wR <sub>2</sub> [I > 2σ(I)] <sup>α</sup> | 0.0303, 0.0536                                        | 0.0244, 0.0485                                        |
| R <sub>1</sub> , wR <sub>2</sub> (all data) <sup>α</sup> | 0.0434, 0.0620                                        | 0.0261, 0.0504                                        |

$$^{\alpha} R_1 = \sum ||F_o| - |F_c|| / \sum |F_o|, wR_2 = \{ \sum w[(F_o)^2 - (F_c)^2]^2 / \sum w[(F_o)^2]^2 \}^{1/2}$$

**Table S2.** Atomic coordinates ( $\times 10^4$ ) and equivalent isotropic displacement parameters ( $\text{\AA}^2 \times 10^3$ ) for  $(3\text{PC})_2(\text{Sb}_4\text{F}_{14})$  and  $(3\text{AP})_2(\text{Sb}_4\text{F}_{13})$ .  $U_{\text{eq}}$  is defined as 1/3 of the trace of the orthogonalised  $U_{ij}$  tensor.

| Compounds                                              | Atom                                                   | x         | y          | z         | U(eq)     |
|--------------------------------------------------------|--------------------------------------------------------|-----------|------------|-----------|-----------|
| <b>(3PC)<sub>2</sub>(Sb<sub>4</sub>F<sub>14</sub>)</b> | Sb(1)                                                  | 7580.4(4) | 3832.3(4)  | 4530.5(2) | 27.87(13) |
|                                                        | Sb(2)                                                  | 3015.9(5) | 1943.9(5)  | 3590.2(3) | 27.85(13) |
|                                                        | F(1)                                                   | 8370(5)   | 5189(4)    | 5790(2)   | 48.9(8)   |
|                                                        | F(2)                                                   | 8906(4)   | 1733(4)    | 5487(2)   | 37.5(7)   |
|                                                        | F(3)                                                   | 5472(4)   | 3397(5)    | 5760(3)   | 52.8(9)   |
|                                                        | F(4)                                                   | 6363(5)   | 1792(5)    | 3958(3)   | 54.4(9)   |
|                                                        | F(5)                                                   | 3971(5)   | 3910(4)    | 2280(3)   | 59.1(10)  |
|                                                        | F(6)                                                   | 4063(4)   | 340(4)     | 2539(2)   | 45.4(8)   |
|                                                        | F(7)                                                   | 787(5)    | 2169(5)    | 2764(3)   | 60.8(10)  |
|                                                        | C(1)                                                   | -1703(7)  | 8073(7)    | 1693(4)   | 31.2(12)  |
|                                                        | C(2)                                                   | 210(6)    | 7756(6)    | 1116(4)   | 23.3(10)  |
|                                                        | C(3)                                                   | 424(7)    | 7288(7)    | -32(4)    | 34.2(12)  |
|                                                        | C(4)                                                   | 2160(8)   | 7028(8)    | -600(4)   | 41.8(14)  |
|                                                        | C(5)                                                   | 3654(7)   | 7258(7)    | -41(4)    | 35.8(13)  |
|                                                        | C(6)                                                   | 1753(6)   | 7953(7)    | 1646(4)   | 28.1(11)  |
|                                                        | N(1)                                                   | 3416(6)   | 7708(6)    | 1062(3)   | 33.0(10)  |
|                                                        | N(2)                                                   | -1927(6)  | 8800(7)    | 2677(3)   | 45.6(13)  |
|                                                        | O(1)                                                   | -2985(5)  | 7678(7)    | 1221(4)   | 66.3(14)  |
|                                                        | <b>(3AP)<sub>2</sub>(Sb<sub>4</sub>F<sub>13</sub>)</b> | Sb(1)     | 3972.2(9)  | 5369.4(8) | 6313.3(6) |
| Sb(2)                                                  |                                                        | 7727.7(9) | 2732.8(7)  | 5306.9(6) | 26.82(16) |
| Sb(3)                                                  |                                                        | 5938.9(9) | -2602.8(8) | 3650.0(6) | 27.18(16) |
| Sb(4)                                                  |                                                        | 2312.6(9) | -1239.0(8) | 4700.3(6) | 27.11(16) |
| F(1)                                                   |                                                        | 3916(10)  | 7978(8)    | 6856(6)   | 35.5(15)  |
| F(2)                                                   |                                                        | 5208(14)  | 6021(11)   | 8321(8)   | 57(2)     |
| F(3)                                                   |                                                        | 6558(8)   | 6636(8)    | 6155(6)   | 39.0(14)  |
| F(4)                                                   |                                                        | 5291(12)  | 3415(9)    | 6416(8)   | 58.6(19)  |
| F(5)                                                   |                                                        | 9978(11)  | 4190(9)    | 7058(6)   | 50.2(18)  |
| F(6)                                                   |                                                        | 7117(9)   | 972(7)     | 6275(5)   | 34.9(13)  |
| F(7)                                                   |                                                        | 9661(10)  | 1653(9)    | 4866(7)   | 50.6(17)  |
| F(8)                                                   |                                                        | 5164(10)  | 158(9)     | 3594(6)   | 47.3(16)  |
| F(9)                                                   |                                                        | 4597(14)  | -3024(11)  | 1677(7)   | 59(2)     |
| F(10)                                                  |                                                        | 5269(10)  | -5206(8)   | 3212(6)   | 46.2(17)  |
| F(11)                                                  |                                                        | 3384(10)  | -3042(9)   | 4045(6)   | 44.9(15)  |
| F(12)                                                  |                                                        | 53(9)     | -3198(9)   | 4760(7)   | 46.3(16)  |
| F(13)                                                  | 569(11)                                                | -1616(10) | 2792(7)    | 46.0(18)  |           |

|  |       |          |           |           |       |
|--|-------|----------|-----------|-----------|-------|
|  | C(1)  | 8030(20) | 3515(16)  | 10467(12) | 36(3) |
|  | C(2)  | 8989(19) | 3080(18)  | 11642(12) | 40(3) |
|  | C(3)  | 8770(20) | 1350(18)  | 11600(12) | 44(3) |
|  | C(4)  | 7550(20) | -18(19)   | 10392(15) | 53(4) |
|  | C(5)  | 6790(18) | 2040(19)  | 9257(12)  | 44(3) |
|  | C(6)  | 2140(20) | 1716(19)  | -452(13)  | 45(3) |
|  | C(7)  | 980(20)  | 150(20)   | -1639(13) | 55(4) |
|  | C(8)  | 830(20)  | -1480(20) | -1536(16) | 55(4) |
|  | C(9)  | 1810(20) | -1820(20) | -345(16)  | 59(4) |
|  | C(10) | 3060(20) | 1330(20)  | 757(13)   | 49(4) |
|  | N(1)  | 6626(16) | 402(14)   | 9264(11)  | 40(3) |
|  | N(2)  | 8150(20) | 5172(15)  | 10460(12) | 64(4) |
|  | N(3)  | 2901(17) | -325(17)  | 780(11)   | 47(3) |
|  | N(4)  | 2350(20) | 3329(16)  | -457(14)  | 68(3) |

**Table S3.** The bond lengths (Å) and calculated bond valences for (3PC)<sub>2</sub>(Sb<sub>4</sub>F<sub>14</sub>) and (3AP)<sub>2</sub>(Sb<sub>4</sub>F<sub>13</sub>).

| Compounds                                             | Bond         | Bond-length | Bond-valence | BVS   |
|-------------------------------------------------------|--------------|-------------|--------------|-------|
| (3PC) <sub>2</sub> (Sb <sub>4</sub> F <sub>14</sub> ) | Sb(1)-F(1)   | 2.074(3)    | 0.625        | 3.093 |
|                                                       | Sb(1)-F(2)   | 1.928(3)    | 0.927        |       |
|                                                       | Sb(1)-F(3)   | 1.927(3)    | 0.930        |       |
|                                                       | Sb(1)-F(4)   | 2.082(3)    | 0.611        | 3.181 |
|                                                       | Sb(2)-F(4)   | 2.521(3)    | 0.187        |       |
|                                                       | Sb(2)-F(5)   | 1.900(3)    | 1.000        |       |
|                                                       | Sb(2)-F(6)   | 1.935(3)    | 0.910        |       |
|                                                       | Sb(2)-F(7)   | 1.940(3)    | 0.897        |       |
|                                                       | Sb(2)-F(1)#1 | 2.520(3)    | 0.187        |       |
| (3AP) <sub>2</sub> (Sb <sub>4</sub> F <sub>13</sub> ) | Sb(1)-F(1)   | 2.103(6)    | 0.578        | 3.045 |
|                                                       | Sb(1)-F(2)   | 1.936(7)    | 0.907        |       |
|                                                       | Sb(1)-F(3)   | 1.920(6)    | 0.947        |       |
|                                                       | Sb(1)-F(4)   | 2.081(6)    | 0.613        |       |
|                                                       | Sb(2)-F(4)   | 2.473(7)    | 0.213        | 3.104 |
|                                                       | Sb(2)-F(5)   | 1.964(6)    | 0.841        |       |
|                                                       | Sb(2)-F(6)   | 1.915(5)    | 0.960        |       |
|                                                       | Sb(2)-F(7)   | 1.955(6)    | 0.862        |       |
|                                                       | Sb(2)-F(8)   | 2.361(7)    | 0.288        | 2.857 |
|                                                       | Sb(3)-F(8)   | 2.473(7)    | 0.212        |       |
|                                                       | Sb(3)-F(9)   | 1.936(6)    | 0.907        |       |
|                                                       | Sb(3)-F(10)  | 1.961(6)    | 0.848        |       |
|                                                       | Sb(3)-F(11)  | 1.943(6)    | 0.890        | 2.818 |
|                                                       | Sb(4)-F(11)  | 1.940(6)    | 0.898        |       |
|                                                       | Sb(4)-F(12)  | 1.947(6)    | 0.881        |       |
|                                                       | Sb(4)-F(13)  | 1.959(6)    | 0.853        |       |
| Sb(4)-F(1)#1                                          | 2.522(6)     | 0.186       |              |       |

Symmetry transformations used to generate equivalent atoms:

For (3PC)<sub>2</sub>(Sb<sub>4</sub>F<sub>14</sub>):

#1 1-x, 1-y, 1-z.

For (3AP)<sub>2</sub>(Sb<sub>4</sub>F<sub>13</sub>):

#1 +x, -1+y, +z.

**Table S4.** Selected Hydrogen bond lengths (Å) and angles (°) for (3PC)<sub>2</sub>(Sb<sub>4</sub>F<sub>14</sub>) and (3AP)<sub>2</sub>(Sb<sub>4</sub>F<sub>13</sub>).

| Compounds                                              | D – H...A      | d(D – H) | d(H...A) | d(D...A)  | ∠(D – H...A) |
|--------------------------------------------------------|----------------|----------|----------|-----------|--------------|
| <b>(3PC)<sub>2</sub>(Sb<sub>4</sub>F<sub>14</sub>)</b> | N2 – H2a...F6  | 0.86     | 2.35     | 3.108(6)  | 143.7        |
|                                                        | N2 – H2b...F2  | 0.86     | 2.35     | 3.117(5)  | 149          |
|                                                        | C6 – H6...F2   | 0.93     | 2.32     | 3.229(5)  | 165.8        |
| <b>(3AP)<sub>2</sub>(Sb<sub>4</sub>F<sub>13</sub>)</b> | N1 – H1...F1   | 0.87     | 1.84     | 2.697(12) | 167          |
|                                                        | N2 – H2a...F13 | 0.87     | 2.04     | 2.907(14) | 171          |
|                                                        | C1 – H10...F10 | 0.94     | 2.16     | 3.080(15) | 167          |

**Table S5.** Calculation of dipole moment for SbF<sub>4</sub>, SbF<sub>5</sub>, Sb<sub>4</sub>F<sub>13</sub> and net dipole moment for a unit cell in (3AP)<sub>2</sub>(Sb<sub>4</sub>F<sub>13</sub>).

| Compounds                                             | groups                          | Dipole moment (D) |             |             |             |
|-------------------------------------------------------|---------------------------------|-------------------|-------------|-------------|-------------|
|                                                       |                                 | total magnitude   | x-component | y-component | z-component |
| (3AP) <sub>2</sub> (Sb <sub>4</sub> F <sub>13</sub> ) | Sb(1)F <sub>4</sub>             | 10.189            | 6.876       | 3.529       | 6.639       |
|                                                       | Sb(2)F <sub>5</sub>             | 8.719             | 1.558       | -7.063      | 4.870       |
|                                                       | Sb(3)F <sub>4</sub>             | 19.160            | -14.582     | -5.348      | -11.230     |
|                                                       | Sb(4)F <sub>4</sub>             | 8.988             | -0.179      | -8.254      | -3.553      |
|                                                       | Sb <sub>4</sub> F <sub>14</sub> | 18.558            | -6.327      | -17.136     | -3.274      |
|                                                       | Net dipole moment (a unit cell) | 18.558            | -6.327      | -17.136     | -3.274      |

**Table S6.** The assignment of the IR absorption peaks for (3PC)<sub>2</sub>(Sb<sub>4</sub>F<sub>14</sub>) and (3AP)<sub>2</sub>(Sb<sub>4</sub>F<sub>13</sub>).

| Assignment (cm <sup>-1</sup> ) | (3PC) <sub>2</sub> (Sb <sub>4</sub> F <sub>14</sub> ) | (3AP) <sub>2</sub> (Sb <sub>4</sub> F <sub>13</sub> ) |
|--------------------------------|-------------------------------------------------------|-------------------------------------------------------|
| $\nu(\text{N} - \text{H})$     | 3455, 3342                                            | 3451, 3363, 3250                                      |
| $\nu(\text{C} - \text{H})$     | 3070-2850, 1050-650                                   | 3070-2880, 1010-650                                   |
| $\nu(\text{C} - \text{C})$     | 1690-1380                                             | 1690-1400                                             |
| $\nu(\text{C} - \text{N})$     | 1350-1110                                             | 1350-1140                                             |
| $\nu(\text{Sb} - \text{F})$    | 600-450                                               | 600-450                                               |



**Table S7.** All the fluoroantimonite compounds with SHG effect and the coordination mode of  $\text{Sb}^{3+}$ .

| Compounds                                                    | Coordination mode of $\text{Sb}^{3+}$             | SHG effect                                | Ref.             |
|--------------------------------------------------------------|---------------------------------------------------|-------------------------------------------|------------------|
| $\text{K}_2\text{SO}_4 \cdot \text{SbF}_3$                   | $\text{SbO}_2\text{F}_3$                          | $0.1 \times \text{KDP}$                   | [13]             |
| $\text{Rb}_2\text{SO}_4 \cdot \text{SbF}_3$                  | $\text{SbO}_2\text{F}_3$                          | $0.3 \times \text{KDP}$                   | [13]             |
| $\text{CsSbClF}_3$                                           | $\text{SbCl}_2\text{F}_3$                         | $0.3 \times \text{KDP}$                   | [14]             |
| $\text{Rb}_2\text{SO}_4 \cdot (\text{SbF}_3)_2$              | $\text{SbO}_2\text{F}_3$                          | $0.5 \times \text{KDP}$                   | [15]             |
| $\text{NH}_4\text{SbF}_2\text{SO}_4$                         | $\text{SbO}_2\text{F}_2$                          | $0.7 \times \text{KDP}$                   | [16]             |
| $\text{RbSbF}_2\text{SO}_4$                                  | $\text{SbO}_3\text{F}_3$                          | $0.96 \times \text{KDP}$                  | [17]             |
| $\text{Zn}_3\text{Sb}_4\text{O}_6\text{F}_6$                 | $\text{SbO}_3$                                    | $40 \times \text{SiO}_2$                  | [18]             |
| $(\text{NH}_4)\text{Sb}_2(\text{C}_2\text{O}_4)\text{F}_5$   | $\text{SbO}_2\text{F}_2 + \text{SbOF}_3$          | $1.1 \times \text{KDP}$                   | [19]             |
| $\text{RbSb}_2(\text{C}_2\text{O}_4)\text{F}_5$              | $\text{SbO}_2\text{F}_2 + \text{SbOF}_3$          | $1.3 \times \text{KDP}$                   | [20]             |
| $(\text{C}_6\text{H}_6\text{N})\text{SbF}_2\text{SO}_4$      | $\text{SbO}_2\text{F}_2$                          | $1.6 \times \text{KDP}$                   | [21]             |
| $\text{C}(\text{NH}_2)_3\text{SbF}_4$                        | $\text{SbF}_4$                                    | $2.0 \times \text{KDP}$                   | [22]             |
| $\text{Rb}_3\text{SbF}_3(\text{NO}_3)_2$                     | $\text{SbO}_2\text{F}_3$                          | $2.2 \times \text{KDP}$                   | [23]             |
| $\text{Rb}_2\text{SbF}_3(\text{NO}_3)_2$                     | $\text{SbO}_3\text{F}_3 + \text{SbO}_2\text{F}_3$ | $2.7 \times \text{KDP}$                   | [24]             |
| $\text{CsSbF}_2\text{SO}_4$                                  | $\text{SbO}_2\text{F}_2$                          | $3.0 \times \text{KDP}$                   | [25]             |
| $\text{NaSb}_3\text{F}_{10}$                                 | $\text{SbF}_3 + \text{SbF}_4$                     | $3.2 \times \text{KDP}$                   | [26]             |
| $(\text{NH}_4)_3\text{SbF}_3(\text{NO}_3)_3$                 | $\text{SbF}_3$                                    | $3.3 \times \text{KDP}$                   | [27]             |
| $\text{K}_2\text{Sb}(\text{P}_2\text{O}_7)\text{F}$          | $\text{SbO}_4\text{F}$                            | $4.0 \times \text{KDP}$                   | [28]             |
| $\text{K}_2\text{SbF}_2\text{Cl}_3$                          | $\text{SbF}_2\text{Cl}_3$                         | $4.0 \times \text{KDP}$                   | [29]             |
| $\text{Rb}_2\text{Sb}(\text{P}_2\text{O}_7)\text{F}$         | $\text{SbO}_4\text{F}$                            | $5.1 \times \text{KDP}$                   | [30]             |
| <b><math>(3\text{AP})_2(\text{Sb}_4\text{F}_{13})</math></b> | <b><math>\text{SbF}_4 + \text{SbF}_5</math></b>   | <b><math>8.1 \times \text{KDP}</math></b> | <b>This work</b> |
| 4-HPY( $\text{Sb}_2\text{O}_2\text{F}_4$ )                   | $\text{SbO}_2\text{F}_2$                          | $12 \times \text{KDP}$                    | [31]             |

**Table S8.** SHG effect and energy bandgap of representative NLO organic-inorganic antimony halides.

| Compounds                                                                                       | SHG effect          | Band gap (eV)    | Thermal stability (°C) | Ref.             |
|-------------------------------------------------------------------------------------------------|---------------------|------------------|------------------------|------------------|
| (R/S-C <sub>5</sub> H <sub>14</sub> N <sub>2</sub> )SbCl <sub>5</sub>                           | 1.93 × KDP          | 3.06             | 220                    | [32]             |
| (C <sub>9</sub> H <sub>14</sub> N)SbCl <sub>4</sub>                                             | 2.1 × KDP           | 3.47             | 147                    | [33]             |
| A <sub>2</sub> Sb(C <sub>2</sub> O <sub>4</sub> )Cl <sub>3</sub><br>(A=NH <sub>4</sub> , K, Rb) | 1.8, 1.6, 2.1 × KDP | 3.55, 3.61, 3.74 | 80, 205, 225           | [34]             |
| (C <sub>7</sub> H <sub>15</sub> NCl)SbCl <sub>4</sub>                                           | 0.53 × KDP          | 3.05             | 227                    | [35]             |
| (C <sub>4</sub> H <sub>10</sub> NO) <sub>2</sub> SbCl <sub>5</sub>                              | 0.12 × KDP          | 3.25             | 202                    | [36]             |
| (C <sub>6</sub> H <sub>14</sub> N) <sub>2</sub> SbCl <sub>5</sub>                               | 0.3 × KDP           | –                | 204                    | [37]             |
| (C <sub>9</sub> H <sub>26</sub> N <sub>3</sub> )SbCl <sub>6</sub>                               | 1.3 × KDP           | 3.24             | 180                    | [38]             |
| (L-Hhis) <sub>2</sub> Sb <sub>2</sub> Cl <sub>8</sub>                                           | 0.1 × KDP           | 3.64             | 240                    | [38]             |
| L-H <sub>2</sub> his·SbBr <sub>5</sub> ·H <sub>2</sub> O                                        | 2.6 × KDP           | 2.73             | 75                     | [38]             |
| (L-H <sub>2</sub> his) <sub>2</sub> ·Sb <sub>3</sub> I <sub>13</sub> ·4H <sub>2</sub> O         | 0.05 × KDP          | 2.20             | 75                     | [39]             |
| <b>(3AP)<sub>2</sub>(Sb<sub>4</sub>F<sub>13</sub>)</b>                                          | <b>8.1 × KDP</b>    | <b>3.05</b>      | <b>153</b>             | <b>This work</b> |

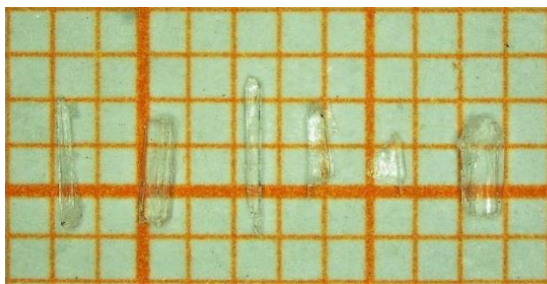

(a)

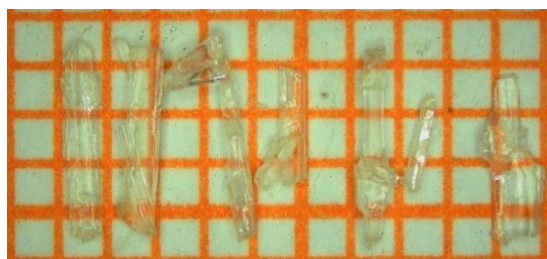

(b)

**Figure S1.** As-grown small crystals of  $(3PC)_2(Sb_4F_{14})$  and  $(3AP)_2(Sb_4F_{13})$ .

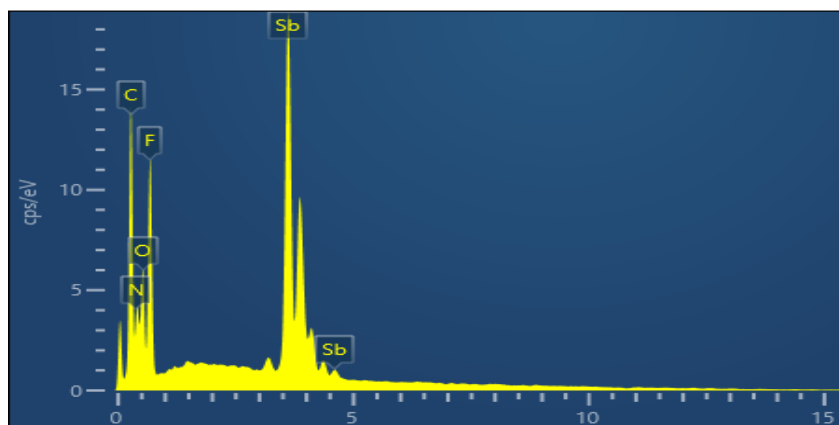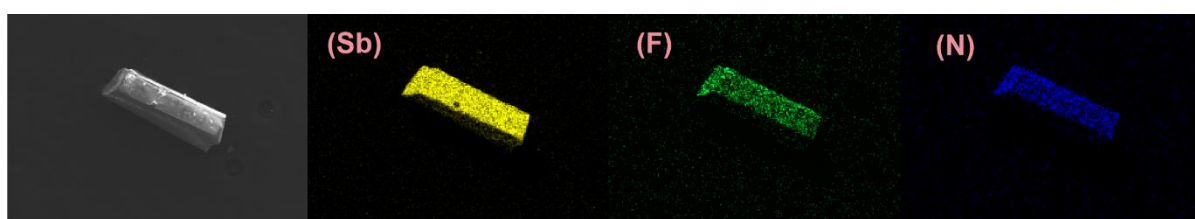

(a)

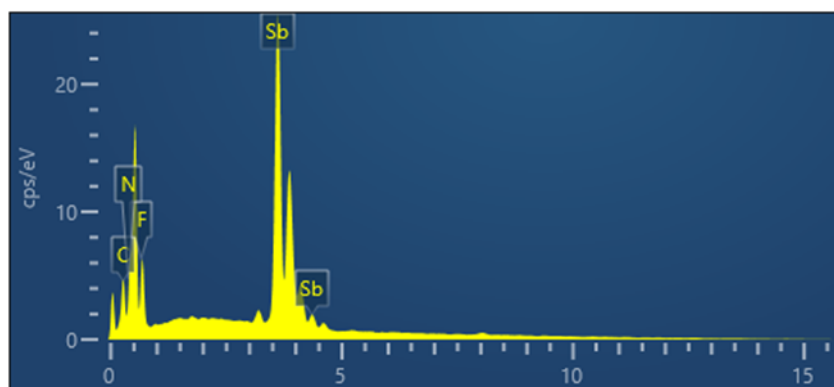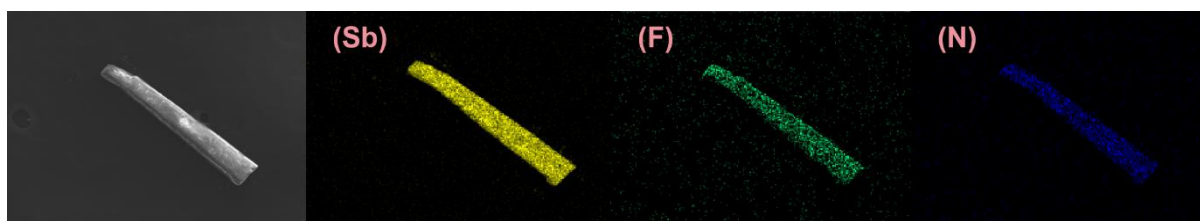

(b)

**Figure S2.** Energy dispersive spectrum analysis and element distribution maps for (3PC)<sub>2</sub>(Sb<sub>4</sub>F<sub>14</sub>) (a) and (3AP)<sub>2</sub>(Sb<sub>4</sub>F<sub>13</sub>) (b).

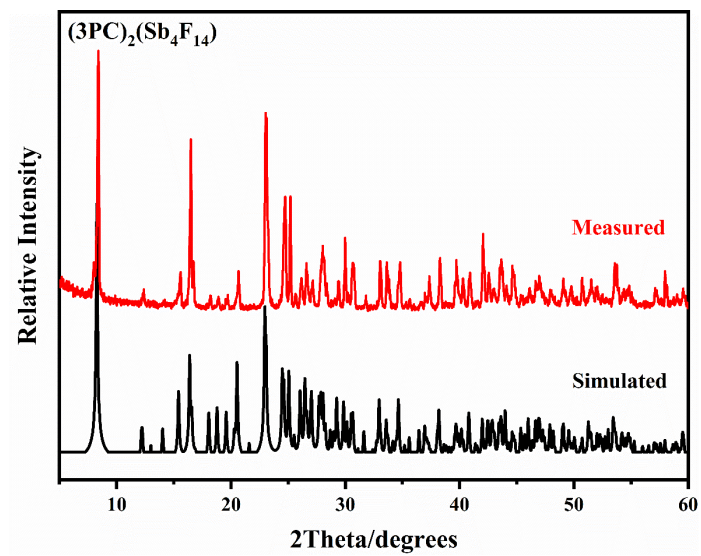

(a)

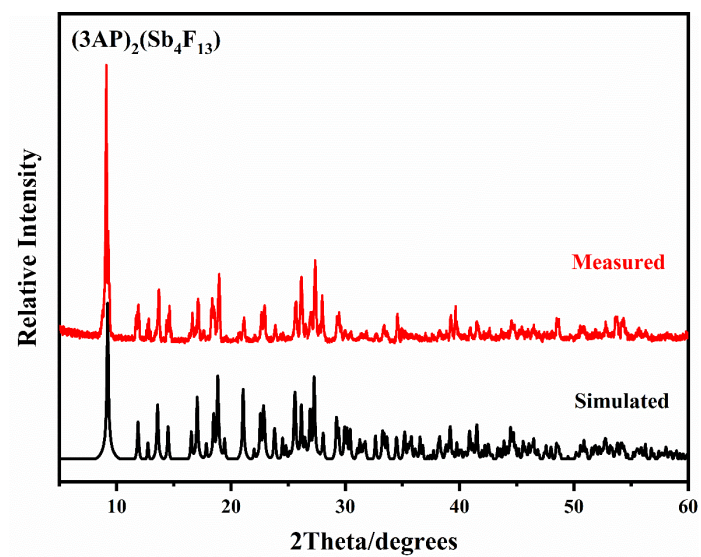

(b)

**Figure S3.** Simulated and measured powder X-ray diffraction patterns of (3PC)<sub>2</sub>(Sb<sub>4</sub>F<sub>14</sub>) (a) and (3AP)<sub>2</sub>(Sb<sub>4</sub>F<sub>13</sub>) (b).

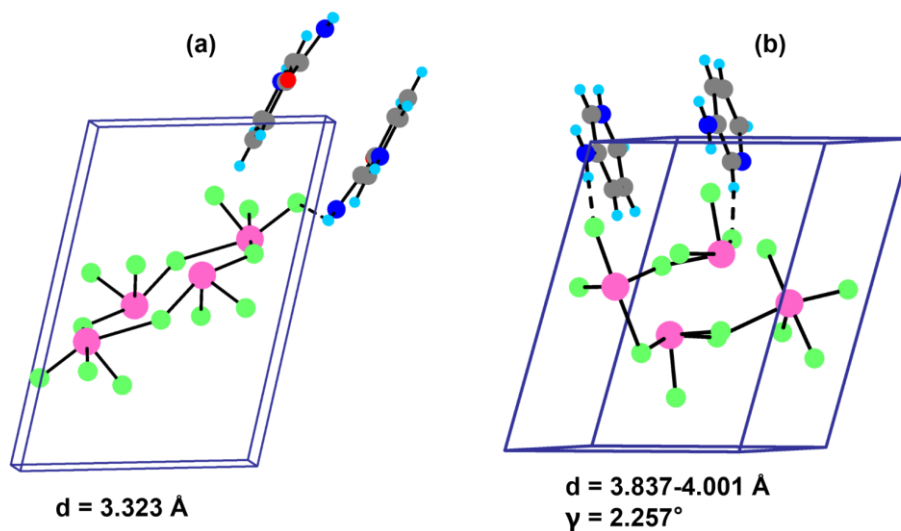

**Figure S4.** Detailed structure views of  $(3PC)_2(Sb_4F_{14})$  (a) and  $(3AP)_2(Sb_4F_{13})$  (b):  $\pi$ - $\pi$  stacking, the dihedral angles ( $\gamma$ ) and inter-ring distances between adjacent organic amines.

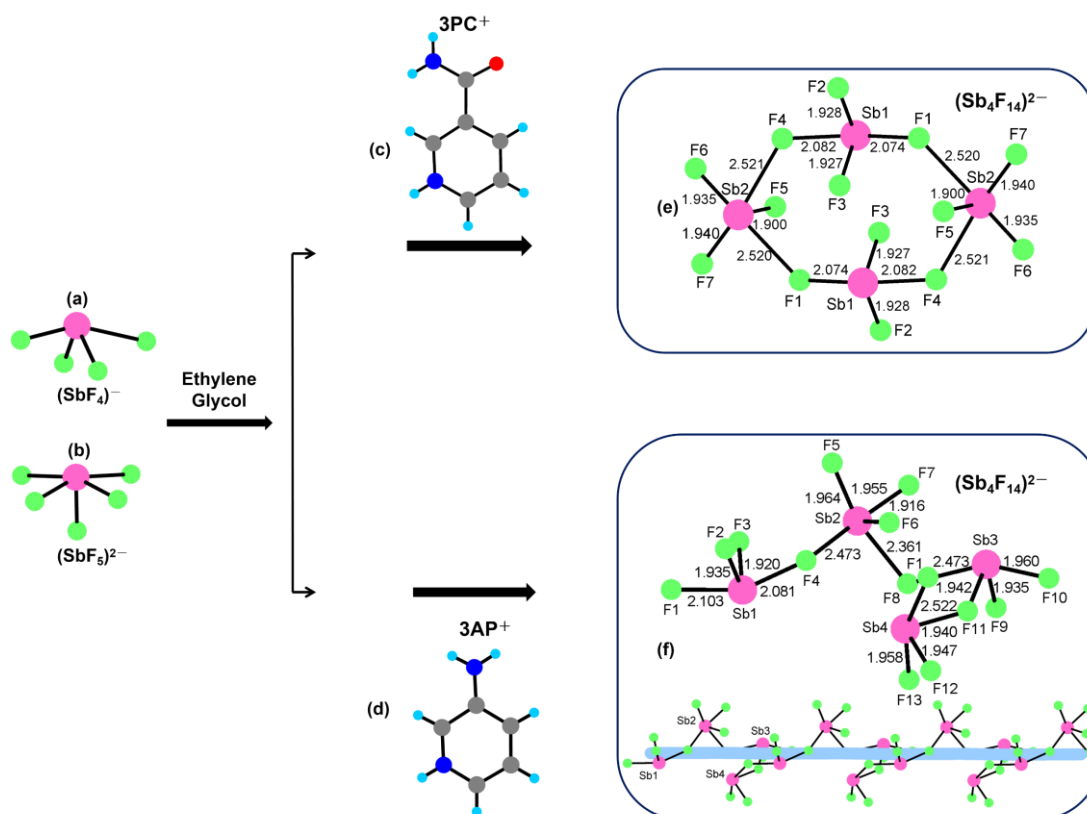

**Figure S5.** The schematic diagram of the formation of the different of polyfluoroantimonite groups.

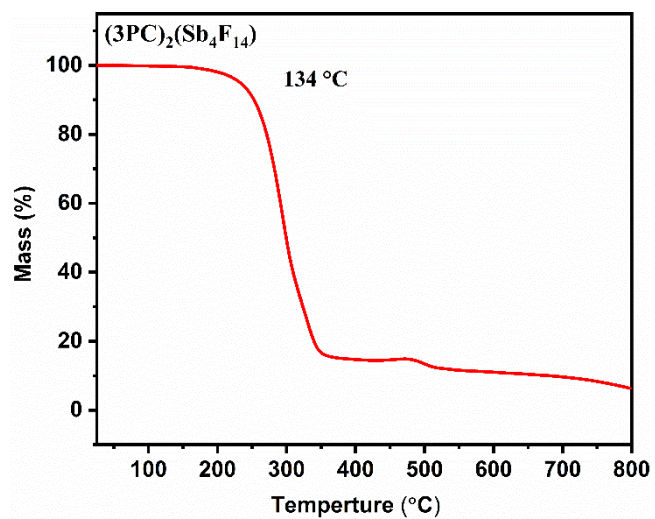

(a)

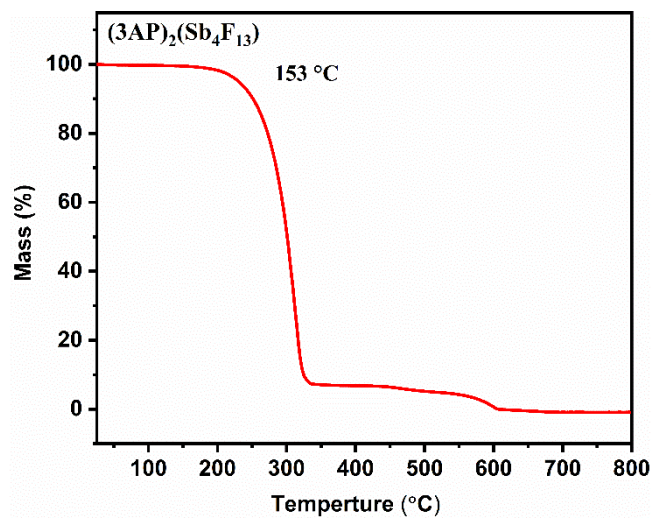

(b)

**Figure S6.** The TGA curves of (3PC)<sub>2</sub>(Sb<sub>4</sub>F<sub>14</sub>) (a) and (3AP)<sub>2</sub>(Sb<sub>4</sub>F<sub>13</sub>) (b).

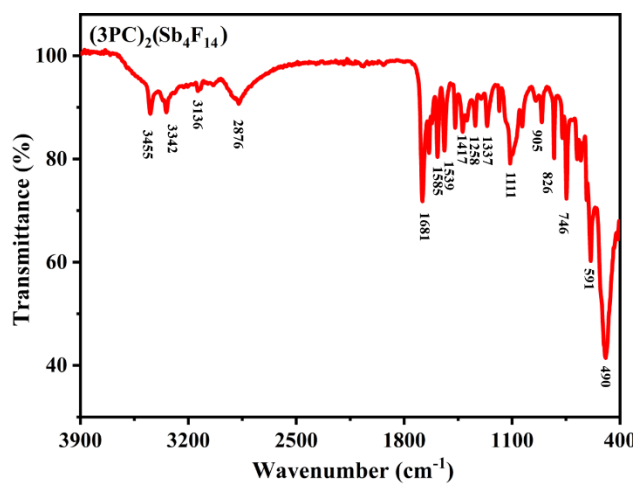

(a)

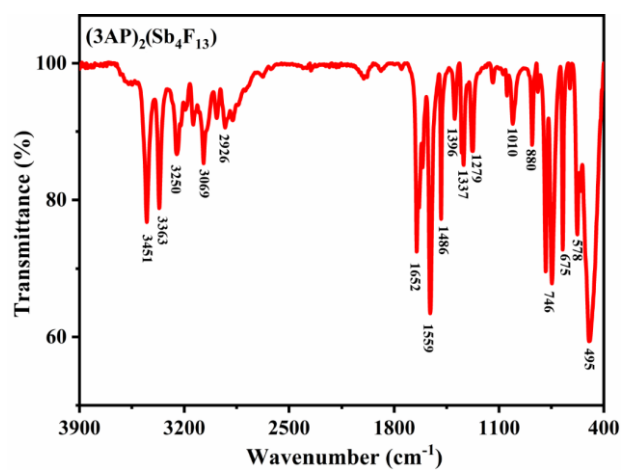

(b)

Figure S7. Infrared spectra of (3PC)<sub>2</sub>(Sb<sub>4</sub>F<sub>14</sub>) (a) and (3AP)<sub>2</sub>(Sb<sub>4</sub>F<sub>13</sub>) (b).



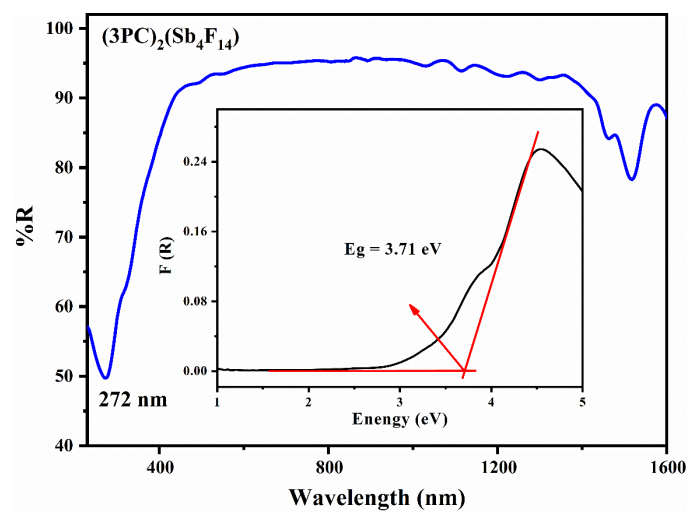

(a)

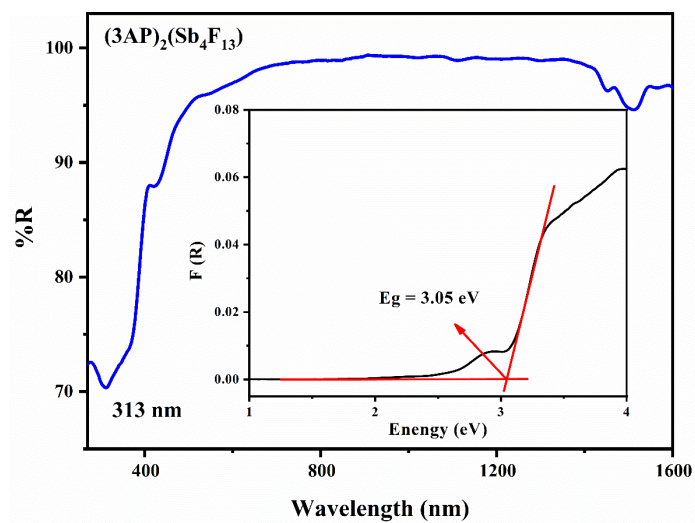

(b)

**Figure S8.** UV-vis-NIR diffuse reflectance spectra of  $(3PC)_2(Sb_4F_{14})$  (a) and  $(3AP)_2(Sb_4F_{13})$  (b).

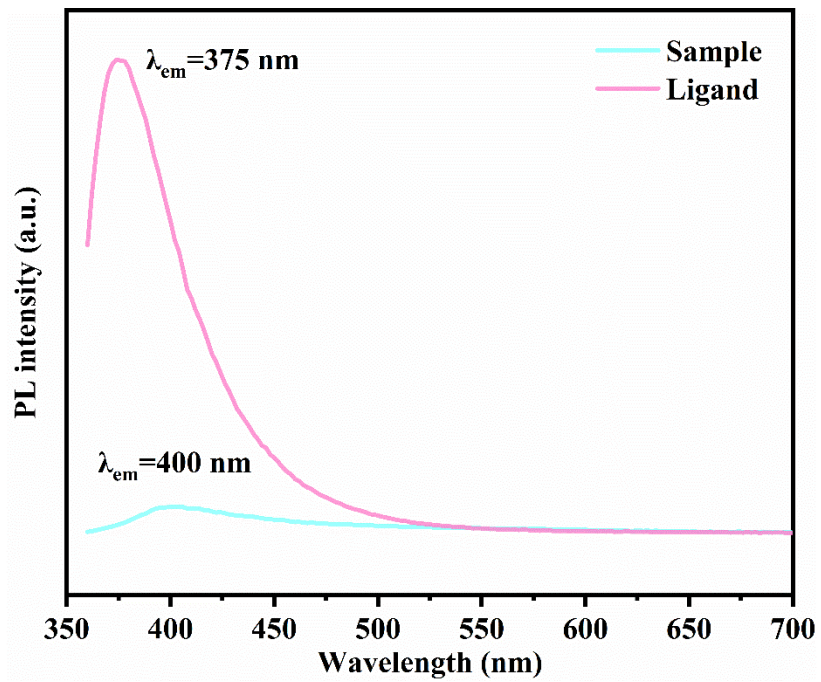

**Figure S9.** Fluorescence spectra for  $(3AP)_2(Sb_4F_{13})$  and 3AP under excitation at 330 nm.

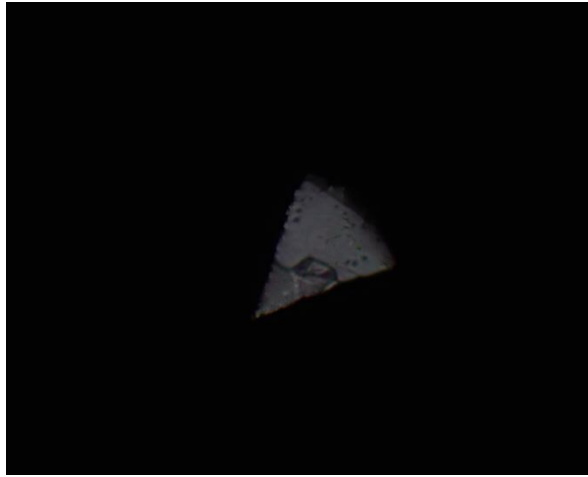

(a)

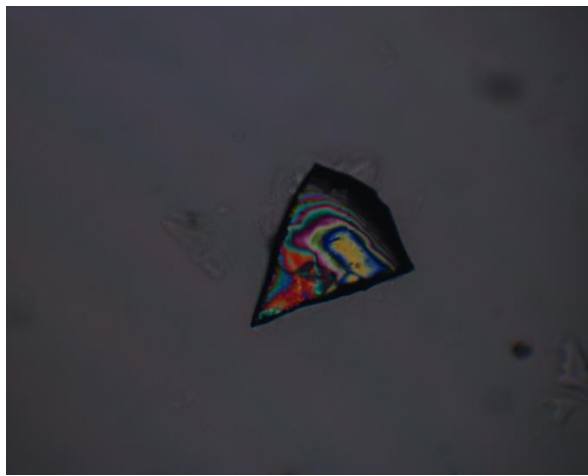

(b)

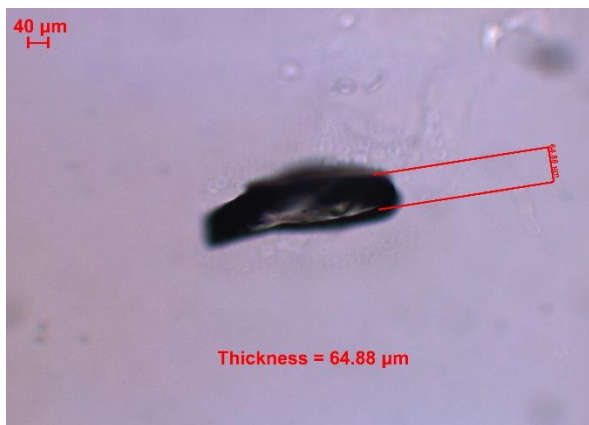

(c)

**Figure S10.** original crystal of  $(3PC)_2(Sb_4F_{14})$  under the ortho-polarized light (a), crystal achieving complete extinction (b) and the crystal thickness (c) of  $(3PC)_2(Sb_4F_{14})$  used for birefringence measurement.

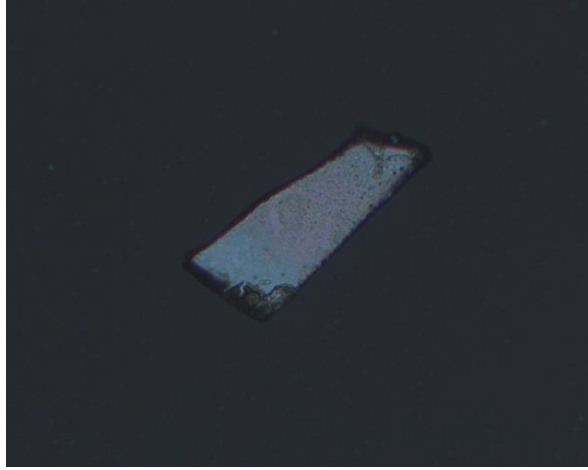

(a)

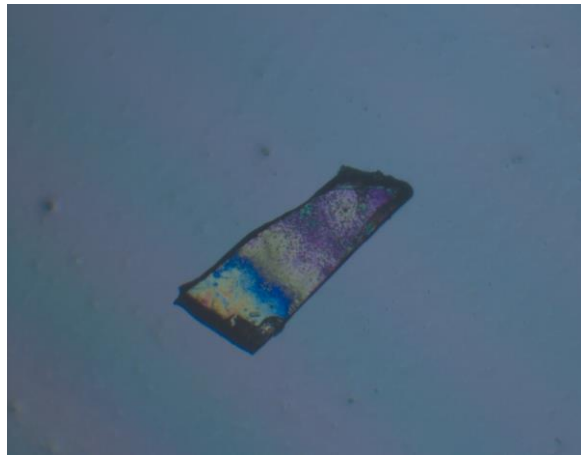

(b)

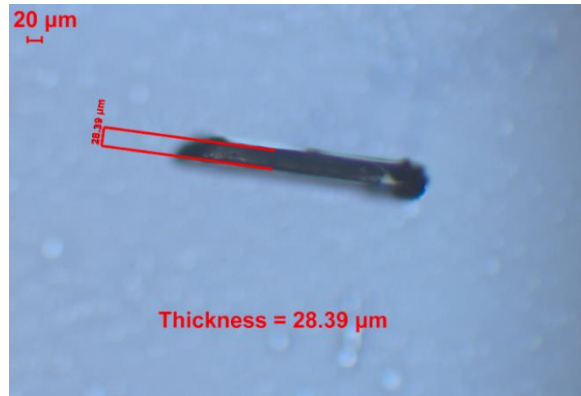

(c)

**Figure S11.** original crystal of  $(3AP)_2(Sb_4F_{13})$  under the ortho-polarized light (a), crystal achieving complete extinction (b) and the crystal thickness (c) of  $(3AP)_2(Sb_4F_{13})$  used for birefringence measurement.

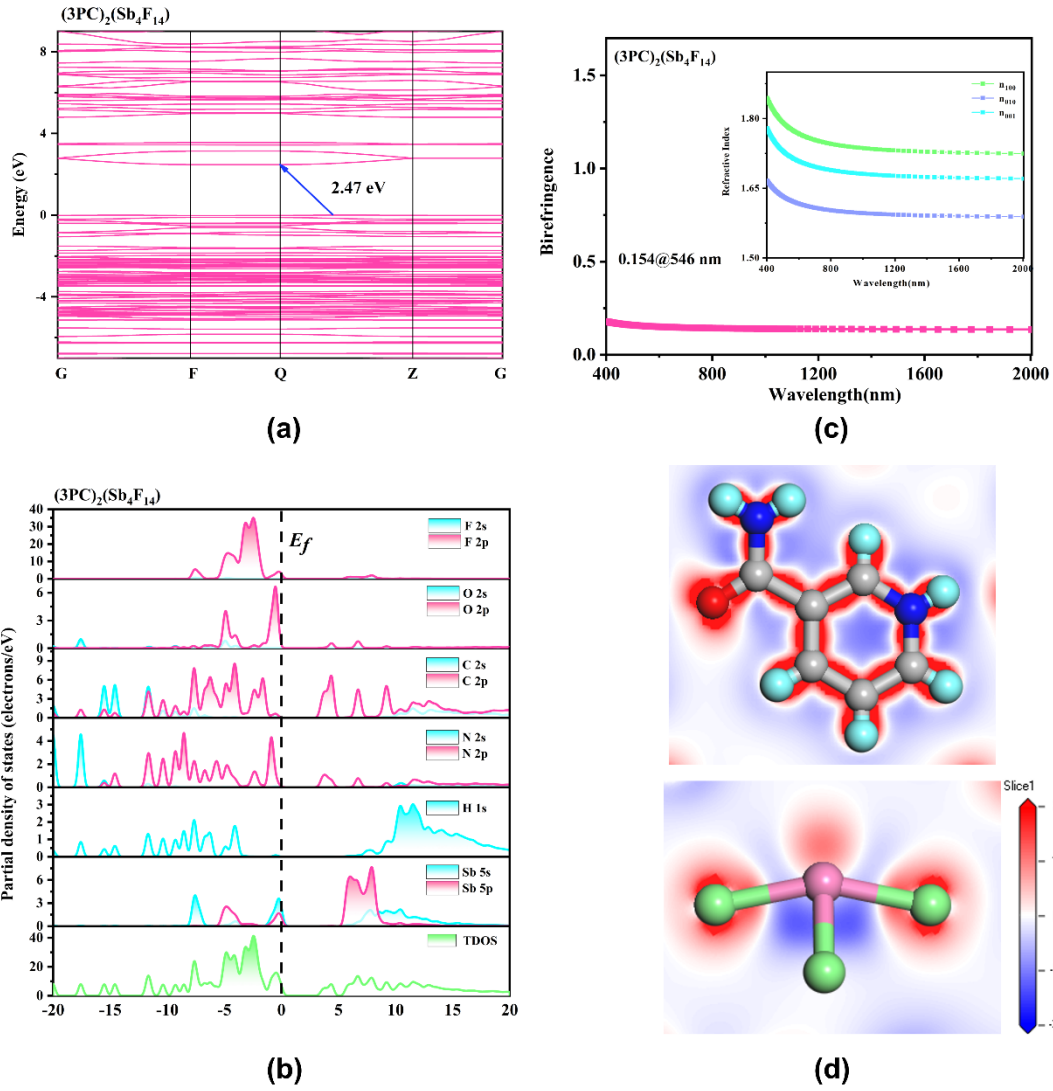

**Figure S12.** The band structure (a), total and partial density of states (b), birefringence (c) and electron density difference maps (d) for  $(3PC)_2(Sb_4F_{14})$ .

## References

- [1] G. M. Sheldrick, *Acta Crystallogr. Sect. C: Cryst. Struct. Commun.* **2015**, *71*, 3-8.
- [2] R. H. Blessing, *Acta Crystallogr.* **1995**, *A51*, 7-13.
- [3] A. L. Spek, *J. Appl. crystallogr.* **2003**, *36*, 7-13.
- [4] J. Tauc, *Mater. Res. Bull.* **1970**, *5*, 721-729.
- [5] L. L. Cao, G. Peng, W. B. Liao, T. Yan, X. F. Long, N. Ye, *CrystEngComm.* **2020**, *22 (11)*, 1956-1961.
- [6] M. D. Segall, P. J. D. Lindan, M. J. Probert, C. J. Pickard, P. J. Hasnip, S. J. Clark, M. C. Payne, *J. Phys.: Condens. Matter* **2002**, *14*, 2717-2744.
- [7] V. Milman, B. Winkler, J. A. White, C. J. Pickard, M. C. Payne, E. V. Akhmatkaya, R. H. Nobes, *Int. J. Quantum Chem.* **2000**, *77 (5)*, 895-910.
- [8] J. P. Perdew, K. Burke, M. Ernzerhof, *Phys. Rev. Lett.* **1996**, *77*, 3865-3868.
- [9] J. S. Lin, A. Qteish, M. C. Payne, V. Heine, *Matter Mater. phys.* **1993**, *47*, 4174-4180.
- [10] C. Aversa, J. Sipe, *Phys. Rev. B: Condens. Matter Mater. Phys.* **1995**, *52*, 14636.
- [11] S. N. Rashkeev, W. R. Lambrecht, B. Segall, *Phys. Rev. B: Condens. Matter Mater. Phys.* **1998**, *57*, 3905.
- [12] J. Lin, M. H. Lee, Z. P. Liu, C. Chen and C. J. Pickard, *Phys. Rev. B: Condens. Matter Mater. Phys.* **1999**, *60*, 13380.
- [13] F. F. He, L. Wang, C. F. Hu, J. Zhou, Q. Li, L. Huang, D. J. Gao, J. Bi, X. Wang, G. Zou, *Dalton Trans.* **2018**, *47*, 17486-17492.
- [14] P. F. Gong, Y. Yang, F. G. You, X. Y. Zhang, G. M. Song, S. Z. Zhang, Q. Huang, Z. S. Lin, *Cryst. Growth Des.* **2019**, *19*, 1874-1879.
- [15] Q. Wang, L. Wang, X. Y. Zhao, L. Huang, D. J. Gao, J. Bi, G. H. Zou, *Inorg. Chem. Front.* **2019**, *6*, 3125-3132.
- [16] F. F. He, Y. W. Ge, X. Y. Zhao, J. He, L. Huang, D. J. Gao, J. Bi, X. Wang, G. H. Zou, *Dalton Trans.* **2020**, *49*, 5276-5282.
- [17] F. Yang, L. J. Huang, X. Y. Zhao, L. Huang, D. J. Gao, J. Bi, X. Wang, G. H. Zou, *J. Mater. Chem. C* **2019**, *7*, 8131-8138.
- [18] S. I. Ali, W. Zhang, P. S. Halasyamani, M. Johnsson, *J. Solid State Chem.* **2017**, *256*, 158-161.
- [19] D. Zhang, Q. Wang, T. Zheng, L. Huang, L. L. Cao, D. J. Gao, J. Bi, G. H. Zou, *J. Alloy. Compd.* **2022**, *896*, 162921.
- [20] W. Y. Wang, X. Y. Wang, L. Xu, D. Zhang, J. L. Xue, S. Y. Wang, X. H. Dong, L. L. Cao, L. Huang, G. H. Zou, *Inorg. Chem.* **2023**, *62*, 13148-13155.
- [21] P. Zhang, X. Mao, X. H. Dong, L. Huang, L. L. Cao, D. J. Gao, G. H. Zou, *Chinese Chem Lett.* **2023**. DOI: 10.1016/j.ccl.2023.109235
- [22] M. Zhang, B. B. Zhang, D. Q. Yang, Y. Wang, *Inorg. Chem.* **2021**, *60*, 18483-18489.
- [23] L. Wang, F. Yang, X. Y. Zhao, L. Huang, D. J. Gao, J. Bi, X. Wang, G. H. Zou, *Dalton Trans.* **2019**, *48*, 15144-15150.
- [24] L. Wang, H. M. Wang, D. Zhang, D. J. Gao, J. Bi, L. Huang, G. H. Zou, *Inorg. Chem. Front.* **2021**, *8*, 3317-3324.
- [25] X. H. Dong, L. Huang, C. F. Hu, H. M. Zeng, Z. E. Lin, X. Wang, K. M. Ok, G. H. Zou, *Angew. Chem. Int. Ed.* **2019**, *58*, 6528-6534.
- [26] G. Zhang, J. G. Qin, T. Liu, Y. J. Li, Y. C. Wu, C. T. Chen, *Appl. Phys. Lett.* **2009**, *95*, 261104.
- [27] Q. Wang, J. X. Ren, D. Wang, L. L. Cao, X. H. Dong, L. Huang, D. J. Gao, G. H. Zou, *Inorg. Chem. Front.* **2023**, *10*, 2107-2114.
- [28] Y. L. Deng, L. Huang, X. H. Dong, L. Wang, K. M. Ok, H. M. Zeng, Z. E. Lin, G. H. Zou, *Angew. Chem. Int. Ed.* **2020**, *59*, 21151-21156.
- [29] Y. Huang, X. G. Meng, P. F. Gong, Z. S. Lin, X. G. Chen, J. G. Qin, *J. Mater. Chem. C* **2015**, *3*, 9588-9593.
- [30] X. H. Dong, H. B. Huang, L. Huang, Y. Q. Zhou, B. B. Zhang, H. M. Zeng, Z. E. Lin, G. H. Zou, *Angew. Chem. Int. Ed.* **2024**, e202318976.
- [31] Q. Lu, X. X. Jiang, K. N. Duanmu, C. Wu, Z. S. Lin, Z. P. Huang, M. G. Humphrey, C. Zhang, *J. Am. Chem. Soc.* **2024**, *146*, 9975-9983.

- [32] S. M. Qi, P. X. Cheng, X. Han, F. Ge, R. C. Shi, L. Xu, G. Li, J. L. Xu, *Cryst. Growth Des.* **2022**, *22*, 6545-6553.
- [33] F. F. Wu, Q. Y. Wei, X. Q. Li, Y. Liu, W. Q. Huang, Q. Chen, B. X. Li, J. H. Luo, X. T. Liu, *Cryst. Growth Des.* , **2022**, *22*, 3875-3881.
- [34] D. Zhang, Q. Wang, H. Luo, L. L. Cao, X. H. Dong, L. Huang, D. J. Gao, G. H. Zou, *Adv. Opt. Mater.* **2023**, *11*, 2202874.
- [35] J. M. Gong, T. Shao, P. Z. Huang, C. Y. Su, M. Chen, D. W. Fu, H. F. Lu, *J. Phys. Chem. C.*, **2022**, *126*, 15274-15279.
- [36] J. C. Zhuang, Y. H. Tan, X. W. Fan, Y. Z. Tang, N. Song, Y. H. Zhang, H. Zhang, S. P. Chen, *New J. Chem.* **2022**, *46*, 7103–7107.
- [37] J. Zhang, S. G. Han, X. T. Liu, Z. Y. Wu, C. M. Ji, Z. H. Sun, J. H. Luo, *Chem. Commun.* **2018**, *54*, 5614–5617.
- [38] X. M. Wen, J. Cheng, P. Q. Qian, Z. Z. Zhang, H. M. Zeng, L. Huang, G. H. Zou, Z. E. Lin, *Dalton Trans.* **2024**, *53*, 260-266.
- [39] J. Cheng, P. Q. Qian, M. Yang, L. Huang, H. M. Zeng, G. H. Zou, Z. E. Lin, *Inorg. Chem.* **2023**, *62*, 16673-16676.
